# Supplementary material for: Core–shell structured luminescent and mesoporous β-NaYF4:Ce3+/Tb3+@mSiO2-PEG nanospheres for anti-cancer drug delivery
Source: Royal Society of Chemistry journal article supplement (doi:10.1039/c3dt50658d), 2013-01-01
Supplement: c3dt50658d.pdf [file c3dt50658d.pdf]

### Supplementary Information:

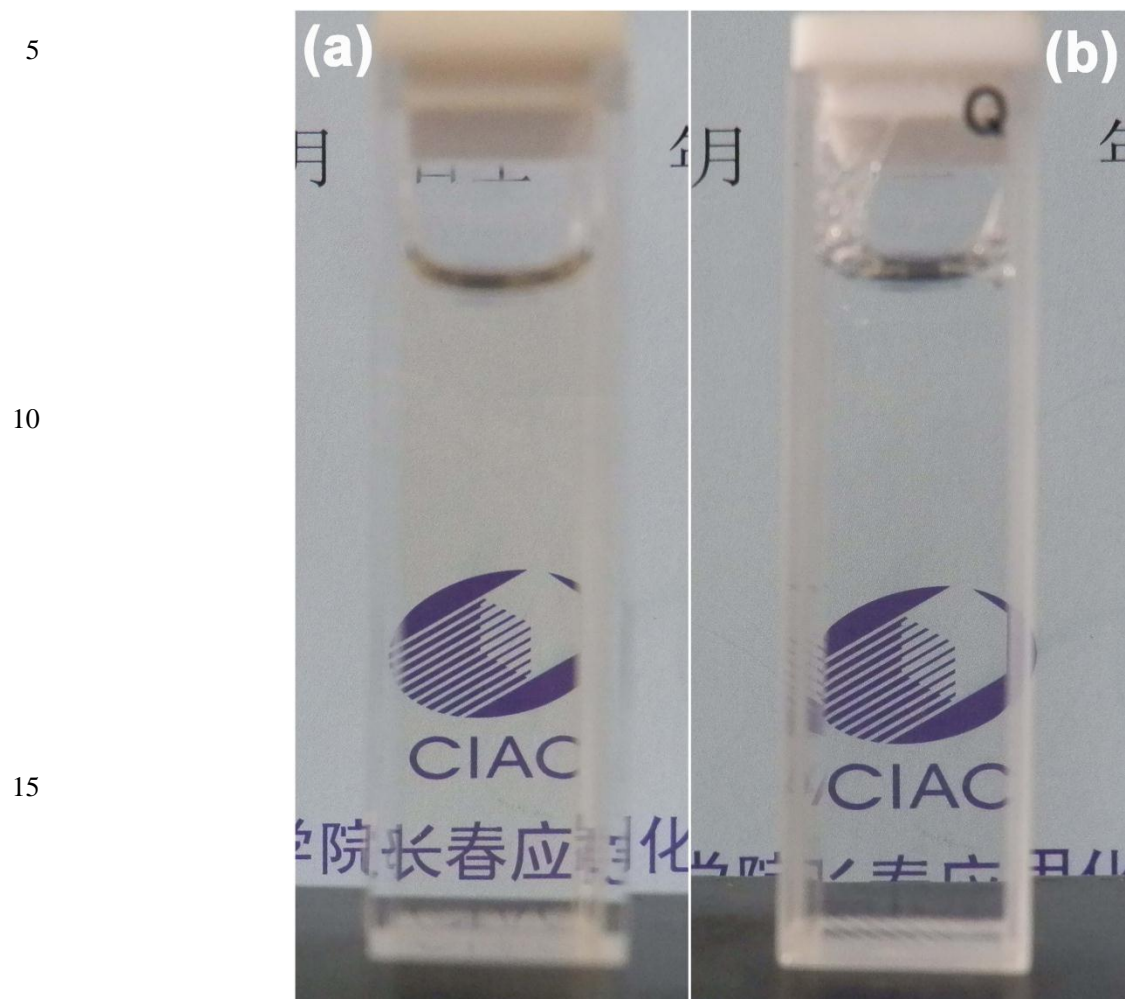

**Figure S1.** Digital photographs of OA-stabilized NPs (a) and water-soluble NPs (b) under daylight.

20

25

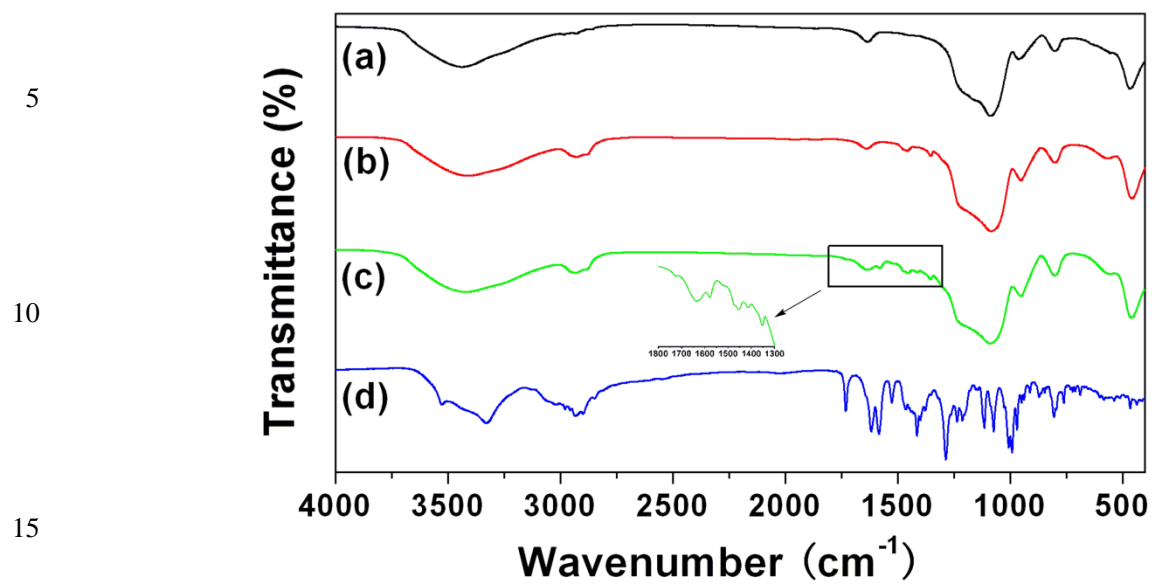

**Figure S2.** FT-IR spectra of NPs@mSiO<sub>2</sub> (a), NPs@mSiO<sub>2</sub>-PEG (b), DOX-loaded NPs@mSiO<sub>2</sub>-PEG (c) and pure DOX (d).

20

25

30

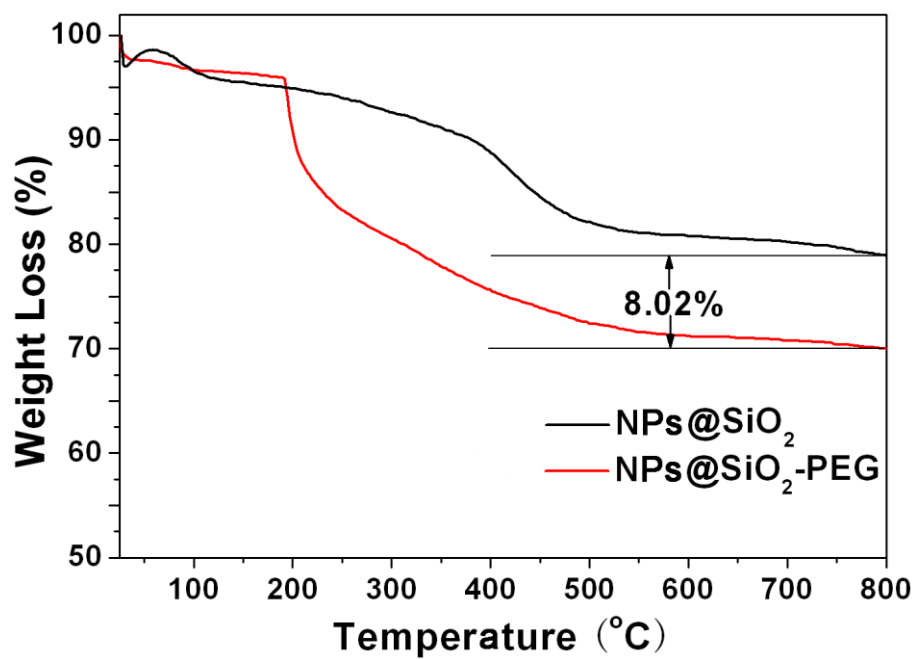

5

**Figure S3.** TG curves of NPs@mSiO<sub>2</sub> and NPs@mSiO<sub>2</sub>-PEG.

10

15

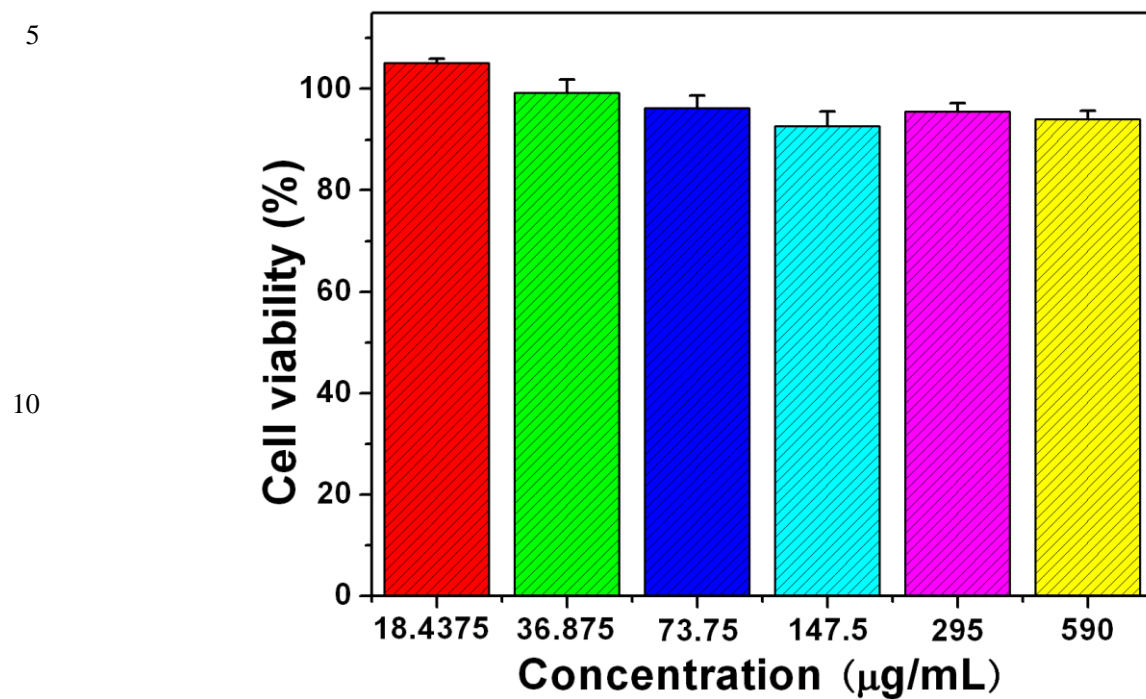

15 **Figure S4.** The L929 fibroblast cells viability after incubating with NPs@mSiO<sub>2</sub>-PEG composite nanospheres for 24 h and quantitative assays by standard MTT method.

20

25

30

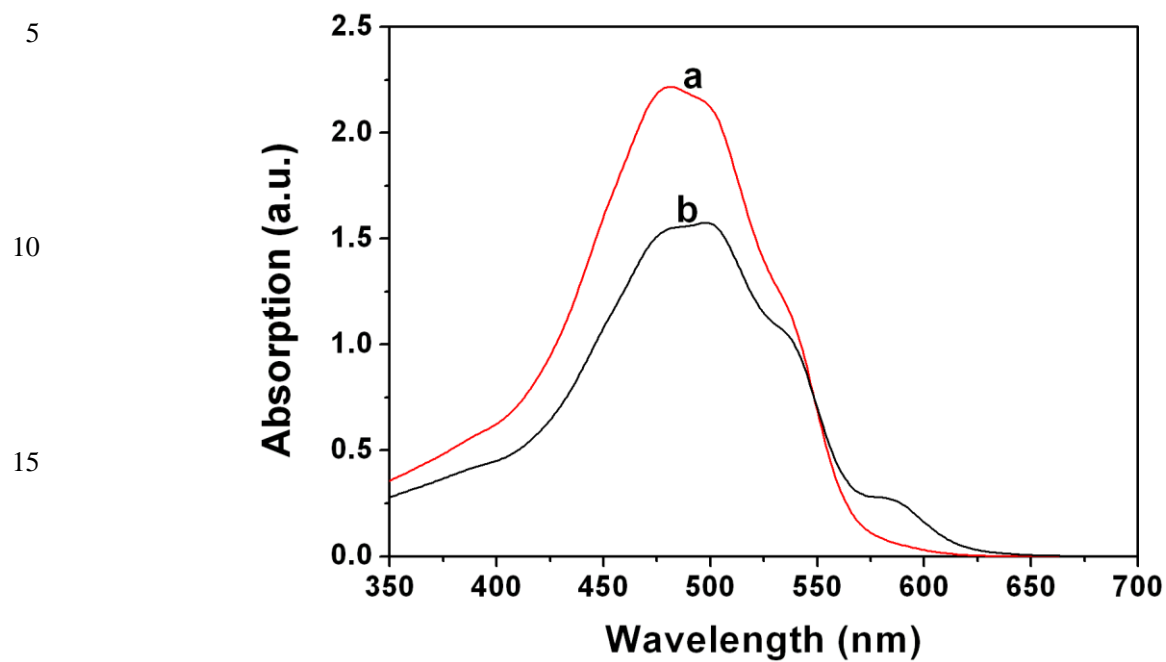

20  
**Figure S5.** UV-vis absorption spectra of DOX solution before (a) and after (b) interaction with NPs@mSiO<sub>2</sub>-PEG nanospheres.
